# Supplementary material
Source: HighWire-hosted journal article supplement (https://spcare.bmj.com/content/8/4/411)
Supplement: inline-supplementary-material-1 [file inline-supplementary-material-1.pdf]

## **Appendix 1. Search strategy**

The search strategy for MEDLINE (Ovid) is as follows, with number of hits for the 2014 search in brackets. This was adapted for other databases and search strategies are available on request.

- 1 exp Palliative Care/ (40025)
- 2 exp Terminal Care/ (41427)
- 3 exp Hospice Care/ (4594)
- 4 palliat\*.tw. (49152)
- 5 hospice\*.tw. (8644)
- 6 (terminal\* and (care or caring or ill\*)).tw. (14524)
- 7 ((advanced or 'end stage' or terminal\*) adj4 (disease\* or illness\* or cancer\* or malignan\*)).tw.  
(115084)
- 8 ('last year of life' or lyol or 'life's end' or 'end of life').tw. (12394)
- 9 or/1-8 (216562)
- 10 (child\* or adolescent\* or infant\* or baby or babies or neonat\* or juvenil\* or pediatric\* or paediatric\*  
or matern\*).ti. (1028881)
- 11 9 not 10 (208790)
- 12 exp Primary Health Care/ (78629)
- 13 exp General Practice/ (63643)
- 14 exp General Practitioners/ (1880)
- 15 exp Physicians, Family/ (14718)
- 16 exp Family Practice/ (60080)
- 17 general practice.tw. (28839)
- 18 (family practice or family medicine).tw. (13017)
- 19 (general practitioner\* or gp\* or general physician\*).tw. (146922)
- 20 (family physician\* or family doctor\* or family practitioner\*).tw. (16343)
- 21 or/12-20 (288767)
- 22 exp Family Nurse Practitioners/ (8)

*Symptom management by general practitioners and general practice nurses*

- 23 exp Nurses, Community Health/ (46)
- 24 exp Patient Care Team/ (54259)
- 25 exp Nutritionists/ (49)
- 26 exp Physical Therapists/ (329)
- 27 exp Social Work/ (15085)
- 28 exp Psychology/ (58272)
- 29 or/22-28 (125712)
- 30 21 and 29 (4215)
- 31 30 and 11 (366)
- 32 30 or 31 (4215)
- 33 limit 32 to English (3723)
- 34 limit 33 to yr="2000 - Current" (2666)
