# Supplementary material
Source: HighWire-hosted journal article supplement (https://spcare.bmj.com/content/8/4/411)
Supplement: inline-supplementary-material-2 [file inline-supplementary-material-2.pdf]

**Appendix 2 Identified studies**

| Study, author, date & location                                                                                | Study design & aim                                                                                                                                                                                                                                                 | Setting, sample size & participant characteristics                                                                                                                     | Intervention                                                           | Quality assessment                     |
|---------------------------------------------------------------------------------------------------------------|--------------------------------------------------------------------------------------------------------------------------------------------------------------------------------------------------------------------------------------------------------------------|------------------------------------------------------------------------------------------------------------------------------------------------------------------------|------------------------------------------------------------------------|----------------------------------------|
| <b>Cross-sectional</b>                                                                                        |                                                                                                                                                                                                                                                                    |                                                                                                                                                                        |                                                                        |                                        |
| <p>GP practice of continuous deep sedation</p> <p>Anquinet(41), 2011, Belgium</p>                             | <p>Cross-sectional</p> <p>Aim: This study aimed to examine the characteristics of one type of palliative sedation, 'continuous deep sedation until death', for patients dying at home in Belgium</p>                                                               | <p>Setting: Home care;</p> <p>Participants GPs of 28 cases of continuous deep sedation until death at home, 192 control patients not receiving sedation.</p>           | <p>Cross-sectional study, qualitative interviews of identified GPs</p> | <p>NOS Cross-sectional</p> <p>5/9</p>  |
| <p>Continuous deep sedation in nursing home patients with dementia</p> <p>Anquinet(57), 2013, Netherlands</p> | <p>Cross-sectional</p> <p>Aim: This study described the characteristics of continuous deep sedation until death and the prior decision-making process of nursing home residents dying with dementia, evaluated according to sedation guideline recommendations</p> | <p>Setting: Nursing homes</p> <p>Participants: 20 nursing home residents dying with dementia or advanced dementia who had continuously deeply sedation until death</p> | <p>Continuous deep sedation</p>                                        | <p>NOS Cross-sectional</p> <p>5/10</p> |

|                                                                                                                                  |                                                                                                                                                                                                                                                                                 |                                                                                                                                             |                                                                                                                          |                                     |
|----------------------------------------------------------------------------------------------------------------------------------|---------------------------------------------------------------------------------------------------------------------------------------------------------------------------------------------------------------------------------------------------------------------------------|---------------------------------------------------------------------------------------------------------------------------------------------|--------------------------------------------------------------------------------------------------------------------------|-------------------------------------|
| <p>GP and oncologist morphine prescription for dyspnoea in terminal lung cancer patients.</p> <p>Ben Diane(51). 2005, France</p> | <p>Cross sectional</p> <p>Aim: To investigate personal, professional, attitudinal factors associated with the first-line prescription of morphine to terminal lung cancer patients with dyspnoea</p>                                                                            | <p>Participants: Random sample of 217 oncologists (response rate 74%) and 502 GPs (response rate 45%)</p>                                   | <p>Validated questionnaire including a clinical case of a patient with terminal lung cancer, with cough and anxiety.</p> | <p>NOS Cross-sectional<br/>9/10</p> |
| <p>Pressure experienced by GPs in making decisions about deep sedation</p> <p>Blanker(62), 2012, Netherlands</p>                 | <p>Cross-sectional</p> <p>Aim: This study described the pressure experienced by general practitioners (GPs) in cases of continuous sedation after the introduction of the Dutch practice guideline</p>                                                                          | <p>Setting: General practice</p> <p>Participants: 319 Of 918 Dutch GPs (43%) reporting on 250 patients who received continuous sedation</p> | <p>Survey questionnaire</p>                                                                                              | <p>NOS Cross-sectional<br/>3/10</p> |
| <p>Blazekovic-Milakovic (34), 2006, Croatia</p>                                                                                  | <p>Cross-sectional</p> <p>Aim: To examine family physicians' views about the disclosure of the diagnosis and information about cancer to their patients and to their families; and establish which health professional is the most appropriate to pass this information on.</p> | <p>Setting: General Practice</p> <p>Participants. 314 GPs</p>                                                                               | <p>Survey questionnaire</p>                                                                                              | <p>NOS Cross-sectional<br/>5/10</p> |

|                                                                                                                      |                                                                                                                                                                           |                                                                                                                                                                                                                    |                                                                                                                                                                                                  |                                        |
|----------------------------------------------------------------------------------------------------------------------|---------------------------------------------------------------------------------------------------------------------------------------------------------------------------|--------------------------------------------------------------------------------------------------------------------------------------------------------------------------------------------------------------------|--------------------------------------------------------------------------------------------------------------------------------------------------------------------------------------------------|----------------------------------------|
| <p>Symptoms in patients receiving palliative care in general practice.</p> <p>Borgsteede (29), 2007, Netherlands</p> | <p>Cross-sectional</p> <p>Aim: to describe the prevalence of symptoms in patients receiving palliative care at home.</p>                                                  | <p>Setting national GP survey</p> <p>Participants: 1608 patients from GPs on national database who died in 1 year survey period</p>                                                                                | <p>Questionnaire, GP reports of symptoms of those patients</p>                                                                                                                                   | <p>NOS Cross-sectional</p> <p>9/10</p> |
| <p>Interdisciplinary cooperation of GPs in palliative care at home</p> <p>Borgsteede (49), Netherlands, 2007.</p>    | <p>Cross-sectional</p> <p>Aim: To investigate the occurrence and predictors of interdisciplinary cooperation of GPs with other caregivers in palliative care at home.</p> | <p>Setting national GP survey</p> <p>Participants: 743 patients receiving home palliative care via GP at home</p>                                                                                                  | <p>Questionnaire, GP reports of symptoms of those patients</p>                                                                                                                                   | <p>NOS Cross-sectional</p> <p>9/10</p> |
| <p>GP survey on pain medication prescription in palliative care</p> <p>Borgsteede(54), 2009, Netherlands</p>         | <p>Cross sectional</p> <p>Aim: to examine GP prescription of pain and adjuvant medication for palliative care patients at home in their last 3 months of life</p>         | <p>Setting: GP practices</p> <p>Participants: representative sample of 95 GP practices registering all patient/GP contacts in 1 yr; 425 pts who died and received palliative care by GPs for at least 3-months</p> | <p>Symptoms, prescriptions collected from the Dutch National Survey of General Practice database. Post Mortem questionnaire completed by GPs for each patient dying during the study period.</p> | <p>NOS Cross-sectional</p> <p>9/10</p> |

|                                            |                                                                                                                                                       |                                                                                                                                                                             |                                  |                     |
|--------------------------------------------|-------------------------------------------------------------------------------------------------------------------------------------------------------|-----------------------------------------------------------------------------------------------------------------------------------------------------------------------------|----------------------------------|---------------------|
| GP management of terminal care             | Cross sectional                                                                                                                                       | Setting: Primary care clinics in a regional health network.                                                                                                                 | Questionnaire survey             | NOS Cross-sectional |
| Canto(36), 2000, Spain                     | Aim: Ascertain the attitudes and training needs of primary health care (PHC) professionals regarding the management of terminal cancer patients.      | Participants: 224 GPs and 186 nurses. 313(76.3%) response rate.                                                                                                             |                                  | 5/10                |
| French-Norwegian GP cancer care comparison | Cross sectional questionnaire - Aim: to explore the diagnostic and therapeutic responsibility role of GPs in the two countries with regard to cancer. | Random sampling of GP's identified through national health boards. Asked to fill in questionnaires for each patient with cancer - 348 GP's participated (7% response rate). | Questionnaire survey             | NOS Cross-sectional |
| Demagny(39), 2009, France and Norway       |                                                                                                                                                       |                                                                                                                                                                             |                                  | 3/10                |
| Continuous palliative sedation             | Cohort                                                                                                                                                | Setting: General practice;                                                                                                                                                  | Retrospective case record review | NOS Cross-Sectional |
| Donker(56), 2013, Netherlands              | Aim: This study aimed to gain more insight into the trends of and reasons for palliative sedation in Dutch general practice                           | Participants: 183 cases of palliative sedation from 56 general practices following continuous deep sedation, identified from Dutch Sentinel General Practice Network.       |                                  | 5/9                 |

|                                                         |                                                                                                                                                                                      |                                                                                    |                                                                                                       |                     |
|---------------------------------------------------------|--------------------------------------------------------------------------------------------------------------------------------------------------------------------------------------|------------------------------------------------------------------------------------|-------------------------------------------------------------------------------------------------------|---------------------|
| To determine if GPs agree with symptom identification   | Cohort                                                                                                                                                                               | Setting: Community based patients                                                  | Completion of a validated symptom effect score                                                        | NOS Cross-sectional |
| Ewing(33), 2006, England                                | Aim: To investigate agreement on symptom assessments between patients at home and GPs and district nurses.                                                                           | Participants: 74 patients paired with GPs, 52 patients paired with district nurses |                                                                                                       | 5/9                 |
| Self-perceived confidence in providing end of life care | Cross-sectional                                                                                                                                                                      | Setting: General Practice, internists across USA.                                  | Questionnaire asking about the frequency of palliative care provided, and confidence in providing it. | NOS Cross-sectional |
| Farber(63), 2004, USA                                   | Aim: To ascertain how frequently Primary Care Physicians are involved in each of the different components in end-of-life care and their perceived competence in each of these areas. | Participants: 462/972 (48%), 50:50 general practitioners and internists.           |                                                                                                       | 3/10                |

|                                                                                               |                                                                                                                                                                                                                                                                                                          |                                                                                                              |                                                                                                                                                                 |                                        |
|-----------------------------------------------------------------------------------------------|----------------------------------------------------------------------------------------------------------------------------------------------------------------------------------------------------------------------------------------------------------------------------------------------------------|--------------------------------------------------------------------------------------------------------------|-----------------------------------------------------------------------------------------------------------------------------------------------------------------|----------------------------------------|
| <p>GP confidence in administering subcutaneous medicine</p> <p>Gorlen(78), 2012, Denmark</p>  | <p>Cross-sectional</p> <p>Aim: To determine the extent to which GPs used fixed SC needles in the last days of patients' lives, to establish whether GPs felt confident being principally responsible for palliative trajectories and whether their confidence was associated with GP characteristics</p> | <p>Setting: Copenhagen, Denmark.</p> <p>Participants: 204 of all 332 GPs practicing in the city. (61.4%)</p> | <p>Cross-sectional questionnaire</p> <p>Questions covered the GPs' use of SC medication/ needle and their confidence in taking responsibility for their use</p> | <p>NOS Cross-sectional</p> <p>5/10</p> |
| <p>Perceived tasks and barriers to GP palliative care</p> <p>Groot(66), 2007, Netherlands</p> | <p>Cross-sectional</p> <p>Aim: to identify the prevalence of such problems in providing palliative care and its determinants.</p>                                                                                                                                                                        | <p>Setting: General Practice</p> <p>Sample size: 320 GPs (62.3% response)</p>                                | <p>Questionnaire survey</p>                                                                                                                                     | <p>NOS Cross-Sectional</p> <p>4/10</p> |

|                                                                                                              |                                                                                                                                                                                                                                                                                                            |                                                                                                                                                                                   |                                                                                                                                                                                 |                     |
|--------------------------------------------------------------------------------------------------------------|------------------------------------------------------------------------------------------------------------------------------------------------------------------------------------------------------------------------------------------------------------------------------------------------------------|-----------------------------------------------------------------------------------------------------------------------------------------------------------------------------------|---------------------------------------------------------------------------------------------------------------------------------------------------------------------------------|---------------------|
| Sensitive issues in end of life care                                                                         | Cross-sectional                                                                                                                                                                                                                                                                                            | Setting: Specialist, general and nursing home practice                                                                                                                            | Questionnaire survey                                                                                                                                                            | NOS Cross-sectional |
| Hasselaar(58), 2008, Netherlands                                                                             | Aim: This study aimed to examine the following sensitive issues involved in continuous deep sedation: artificial hydration, sedation for nonphysical discomfort, the relationship between continuous deep sedation and euthanasia, and patient involvement in decision making for continuous deep sedation | Sample size: 727 medical specialists, 626 general practitioners, and 111 nursing home physicians and the patients to whom they last administered continuous deep sedation (n=304) |                                                                                                                                                                                 | 3/10                |
| Readiness of GPs to prescribe methadone.                                                                     | Cross-sectional                                                                                                                                                                                                                                                                                            | Setting Family Physicians in British Columbia, Canada                                                                                                                             | Questionnaire survey                                                                                                                                                            | NOS Cross-sectional |
| Hawley(73), 2013, Canada                                                                                     | Aim: To determine the barriers to family physicians becoming authorized to prescribe methadone for pain in palliative care.                                                                                                                                                                                | Sample size 204 respondents from 870 randomly selected Family physicians                                                                                                          |                                                                                                                                                                                 | 4/10                |
| Age-related difference in end-of-life care/symptom experience for the elderly cancer patients dying at home. | Cross sectional                                                                                                                                                                                                                                                                                            | Setting 16 GP clinics                                                                                                                                                             | Data collected on symptoms and end-of life care in the last 2 days of life. Post-mortem questionnaire completed by GPs referring to medical record plus clinical recall of case | NOS Cross-sectional |
| Hirakawa(53), 2007, Japan                                                                                    | Aim: to describe age-related differences in symptom experience and care receipt of elderly cancer patients at end-of-life                                                                                                                                                                                  | Participants: 240 consecutive $\geq 65$ yrs old decedents - cancer pts who died at home. Two groups: 65-74 yrs old (n=66) and $\geq 75$ yrs old (N=51).                           |                                                                                                                                                                                 | 5/10                |



|                                                                                                                     |                                                                                                                                                                           |                                                                                                                                                                                                            |                                  |                                 |
|---------------------------------------------------------------------------------------------------------------------|---------------------------------------------------------------------------------------------------------------------------------------------------------------------------|------------------------------------------------------------------------------------------------------------------------------------------------------------------------------------------------------------|----------------------------------|---------------------------------|
| Regional medical professionals confidence in providing palliative care<br><br>Hirooka(68), 2014, Japan              | Cross-sectional<br><br>Aim: Explores confidence in the ability to provide palliative care and associated difficulties and to explore correlations between these variables | Setting: Japan<br><br>Participants: 7905 medical professionals surveyed, responses from 409 hospital doctors, 235 general practitioners, 2160 hospital nurses and 115 home visiting nurses completed them. | Cross-sectional mail survey      | NOS Cross-sectional<br><br>6/10 |
| Palliative care consultations<br><br>Kuin(35), 2004, Netherlands                                                    | Cross sectional<br><br>Aim: investigate the type of problems encountered by PC community teams through phone consultations deal with.                                     | Setting: community palliative care consultation team.<br><br>Participants: 2040 phone consultations from professionals<br>Participants were nurses and doctors working in palliative care.                 | Retrospective case note analysis | NOS Cross-sectional<br><br>7/10 |
| Communication between specialists and GPs in head and neck cancer treatment.<br><br>Ledeboer(38), 2006, Netherlands | Cross sectional questionnaire<br><br>Aim: to find possible gaps in care and communication and to use the GPs ideas to improve the cancer centre's performance             | Setting Head and neck cancer patients in general practices<br><br>Population: 55 GPs whose patient utilised the service. 41 of 55 GP responded (75%).                                                      | Questionnaire survey             | NOS Cross-sectional<br><br>8/10 |

|                                                                                                           |                                                                                                                                                    |                                                                                                                                                                                                                      |                                                                                                                                                                                                          |                                 |
|-----------------------------------------------------------------------------------------------------------|----------------------------------------------------------------------------------------------------------------------------------------------------|----------------------------------------------------------------------------------------------------------------------------------------------------------------------------------------------------------------------|----------------------------------------------------------------------------------------------------------------------------------------------------------------------------------------------------------|---------------------------------|
| GP reasons to phone palliative care advice line for pain management.<br><br>Linklater(50), 2009, Scotland | Cross sectional<br><br>Aim: To identify the reasons for GPs contacting specialist advice line about pain issues.                                   | Setting: Records from phone advice line<br><br>Participants: All phone calls recorded between 2000 and 2006 to the palliative care advice line (n=146), all calls from GPs for pain management were included (N=244) | Record of each call including patient details, reason for calling, advice given.                                                                                                                         | NOS Cross-sectional<br><br>6/10 |
| GP attitudes towards treating terminally ill patients.<br><br>Mas(52), 2010, France.                      | Cross sectional<br><br>Aim: To understand what factors influence GP decision to prescribe opioids and make frequent home visits to dying patients. | Setting: convenience sample of French GPs<br><br>Participants: 115/150 GPs (78% response rate)                                                                                                                       | 48 vignettes of dying pts with all combinations of the patient and GP studied factors In 478 scenarios of dying patients. GPs assessed acceptability of opioid prescription and of frequent home visits. | NOS Cross-sectional<br><br>7/10 |
| Audit of palliative care by English rural GPs<br><br>Mitchell(30), 2003, UK                               | Retrospective case audit<br><br>Aim: to identify services provided to pall care patient by GP's                                                    | Setting: rural primary care<br><br>Population: 93 patients who had died, cared for by 15 GPs                                                                                                                         | Retrospective case audit                                                                                                                                                                                 | NOS Cross-sectional<br><br>6/10 |

|                                                                                           |                                                                                                                                                                                                      |                                                                                                                                                                                                  |                                                                                                                                                                                                                                                                                       |                                  |
|-------------------------------------------------------------------------------------------|------------------------------------------------------------------------------------------------------------------------------------------------------------------------------------------------------|--------------------------------------------------------------------------------------------------------------------------------------------------------------------------------------------------|---------------------------------------------------------------------------------------------------------------------------------------------------------------------------------------------------------------------------------------------------------------------------------------|----------------------------------|
| GP knowledge and use of palliative radiotherapy<br><br>Olson(75), 2012, Canada.           | Cross-sectional<br><br>Aim: To assess the relationships between GPs' referral for palliative RT, knowledge of indications for palliative RT, and prior training in palliative care and radiotherapy. | Setting: British Columbia<br>Participants: 333/1000 (33%) urban and rural GPs                                                                                                                    | Cross-sectional mail survey                                                                                                                                                                                                                                                           | NOS Cross-sectional<br><br>7/10  |
| Community-based audit of cancer pain management by GPs<br><br>Oxenham(48), 2003, Scotland | Cross sectional<br><br>Aim: To describe community-based cancer pain management by GPs.                                                                                                               | Participants: 88% of Lanarkshire GP practices Patients visited at home (n=541pts) and 3259 home visits)                                                                                          | Pain audit tool developed by multidisciplinary group using modified Delphi Technique.                                                                                                                                                                                                 | NOS Cross-sectional<br><br>6/10  |
| Opioid prescribing in terminal cancer<br><br>Salvato(71), 2003, Italy                     | Cohort<br><br>Aim: The rate and adequacy of opioid prescribing. Attitudes in prescribing opioid analgesics by general practitioners of the Treviso district in 2001.                                 | Setting: Treviso district (Veneto Region)<br><br>Participants:2125 patients prescribed opioids for end stage cancer between 1993-2000.<br><br>GPs sent questionnaires = 104/320 (32.5% response) | Descriptive statistics for demographics, type of opioid. Relational statistics to determine patterns of opioid prescription. Standardised dose units used to determine adequacy of dosing.<br><br>Questionnaires seeking responses about what patients fear when prescribing opioids. | NOS Cross-sectional<br><br>10/10 |

|                                                                          |                                                                                                                                                                            |                                                                                                      |                                                                                                                                                                                                                               |                                                |
|--------------------------------------------------------------------------|----------------------------------------------------------------------------------------------------------------------------------------------------------------------------|------------------------------------------------------------------------------------------------------|-------------------------------------------------------------------------------------------------------------------------------------------------------------------------------------------------------------------------------|------------------------------------------------|
| Family Physician attitudes towards cancer treatments and palliative care | Cross-sectional<br><br>Aim: To assess family physicians' views on common indications for palliative radiotherapy and to determine whether this influences patient referral | Setting: eastern Ontario<br><br>Participants: 172/344 GPs                                            | Cross sectional survey assessing GP palliative care practice and referral patterns for palliative radiation therapy; knowledge of radiation therapy, contact with radiation oncologists, past education in radiation therapy. | NOS Cross-sectional<br><br>3/10                |
| Samant(76), 2006, Canada                                                 |                                                                                                                                                                            |                                                                                                      |                                                                                                                                                                                                                               |                                                |
| Clinical problems in patients with high grade glioma                     | Cross-sectional<br><br>Aim: The purpose of this study was to explore specific problems and needs experienced in the end-of-life phase of patients with high grade glioma   | Setting: Neuro-oncology outpatient clinic; Sample size: 55 patients who subsequently died            | Retrospective case review                                                                                                                                                                                                     | NOS Cross-sectional<br><br>Studies<br><br>3/10 |
| Sizoo(44), 2010, Netherlands                                             |                                                                                                                                                                            |                                                                                                      |                                                                                                                                                                                                                               |                                                |
| Oxycodone use survey                                                     | Cross-sectional<br><br>Aim: To evaluate the prescribing of oxycodone inpatients at a tertiary care centre                                                                  | Setting: Hospice (day care and inpatients)<br><br>Participants 51 patients who were taking oxycodone | Prospective clinical record review.<br><br>Determine prevalence of oxycodone use by different health professional groups                                                                                                      | NOS Cross-sectional<br><br>2/10                |
| Todd(70), 2013, England                                                  |                                                                                                                                                                            |                                                                                                      |                                                                                                                                                                                                                               |                                                |

|                                                                                                                       |                                                                                                                                                                                                                     |                                                                                                                                                                                       |                                                                                          |                                        |
|-----------------------------------------------------------------------------------------------------------------------|---------------------------------------------------------------------------------------------------------------------------------------------------------------------------------------------------------------------|---------------------------------------------------------------------------------------------------------------------------------------------------------------------------------------|------------------------------------------------------------------------------------------|----------------------------------------|
| <p>Phone advice by palliative care trained GPs to colleagues re palliative sedation and euthanasia</p>                | <p>Cross sectional</p> <p>Aim: This study aimed to reveal how often and in what way palliative sedation and euthanasia were discussed in consultations between specially trained GPs and those receiving advice</p> | <p>Setting: General practice;</p> <p>Participants: 415 analysed consultations between GP with palliative care training and general practitioners without palliative care training</p> | <p>Cohort, quantitative and qualitative case note review</p>                             | <p>NOS Cross-Sectional</p> <p>5/9</p>  |
| <p>van Heest(61), 2009, Netherlands</p>                                                                               |                                                                                                                                                                                                                     |                                                                                                                                                                                       |                                                                                          |                                        |
| <p>Physician-Reported Symptoms and Interventions in People with Intellectual Disabilities Approaching End of Life</p> | <p>Cross-sectional</p> <p>Aims: To determine the prevalence rates of symptoms at the moment of physicians' recognition, and treatments offered in the period to death</p>                                           | <p>Setting: home and institutional care</p> <p>Participants – ID physicians caring for 81 patients with ID varying from mild to profound</p>                                          | <p>Cross-sectional retrospective death assessment completed by the patient's doctor.</p> | <p>NOS Cross-Sectional</p> <p>5/10</p> |
| <p>Vriemoeth, 2016, Netherlands(28)</p>                                                                               |                                                                                                                                                                                                                     |                                                                                                                                                                                       |                                                                                          |                                        |

|                                                                             |                                                                                                                                                                                                                                             |                                                                                  |                                                       |                     |
|-----------------------------------------------------------------------------|---------------------------------------------------------------------------------------------------------------------------------------------------------------------------------------------------------------------------------------------|----------------------------------------------------------------------------------|-------------------------------------------------------|---------------------|
| Referral to radiation therapy –GP practices                                 | Cross-sectional                                                                                                                                                                                                                             | Setting: General Practice                                                        | Survey questionnaire                                  | NOS Cross-sectional |
| Vulto(74), 2009, Belgium                                                    | Aim: To evaluate knowledge of palliative radiation therapy and factors which influence GP referrals                                                                                                                                         | Participants: 498/1100 GPs                                                       |                                                       | 2/10                |
| GP perspective of terminal care at home                                     | Cross-sectional                                                                                                                                                                                                                             | Setting: General Practice and home                                               | Survey questionnaire                                  | NOS Cross-sectional |
| Walsh(65), 2001, Ireland                                                    | Aim: To identify the problems experienced by GPs when caring for terminally ill cancer patients at home, and about their perceived needs for both further training and support services.                                                    | Participants: 102/200 (51%) GPs                                                  |                                                       | 2/10                |
| Danish general practitioners' self-reported competences in end-of-life care | Cross-sectional                                                                                                                                                                                                                             | Setting - Central Denmark                                                        | Cross-sectional questionnaire                         | NOS Cross-sectional |
| Wintheriek (2016)(37) Denmark                                               | Aims: To assess to which degree GPs report to provide EOL care with regard to patients with different diseases, their confidence with being a key worker, their organisation of EOL care and their medical and psychosocial EOL care skills | Participants: 573/742 GPs (all registered GPs in central Denmark. (68% response) | Self report of confidence in offering palliative care | 5/8                 |

## Cohort studies

|                                                           |                                                                                                                                                             |                                                                                                                                                                                                        |                                                                                                                       |                   |
|-----------------------------------------------------------|-------------------------------------------------------------------------------------------------------------------------------------------------------------|--------------------------------------------------------------------------------------------------------------------------------------------------------------------------------------------------------|-----------------------------------------------------------------------------------------------------------------------|-------------------|
| Factors associated with opioid prescribing in cancer pain | Cohort                                                                                                                                                      | Setting: UIK GP Research Database (GPRD)                                                                                                                                                               | Characteristics associated with opioid prescribing were investigated by using generalized estimation equation models. | NOS Cohort<br>6/9 |
| Higginson(72), 2012, England                              | Aim: To determine time trends and characteristics associated with opioid analgesic prescribing to patients with cancer who are approaching the end of life. | Participants: 29,825 patients diagnosed with five common cancers - lung (34.2%), colorectal (19.9%), female breast (21.6%), prostate (19.1%), and head and neck (5.2%) who died between 2000 and 2008. |                                                                                                                       |                   |

## Qualitative studies

|                                                                                                        |                                                                                                                 |                                                                    |              |                                        |
|--------------------------------------------------------------------------------------------------------|-----------------------------------------------------------------------------------------------------------------|--------------------------------------------------------------------|--------------|----------------------------------------|
| Factors supporting good partnership working between generalist and specialist palliative care services | Qualitative                                                                                                     | Setting: General practice and hospice.                             | Focus groups | CASP <sup>2</sup> Qualitative<br>16/18 |
| Gardiner(69), 2012, England                                                                            | Aim: to explore the attitudes of health care professionals to opioid prescribing in generalist end of life care | Participants: GP Focus groups (N=19); Hospice focus groups (N=12). |              |                                        |

|                                                                                                                             |                                                                                                                                                                                       |                                                                                                                                                                                                                          |                                                                                                           |                               |
|-----------------------------------------------------------------------------------------------------------------------------|---------------------------------------------------------------------------------------------------------------------------------------------------------------------------------------|--------------------------------------------------------------------------------------------------------------------------------------------------------------------------------------------------------------------------|-----------------------------------------------------------------------------------------------------------|-------------------------------|
| Effect of the Shipman murders on the prescription of opioids for dyspnoea in terminal COPD.<br><br>Gott(45), 2010, England. | Qualitative<br><br>Aim: To explore the impact of the Shipman murders on the opioid prescribing practice for severe dyspnoea in terminal COPD, in primary and secondary care settings. | Setting: sociodemographically contrasting areas of England.<br><br>Participants: 3 focus groups were held in primary care settings (N=19 health professionals) and 2 secondary care settings (N=20 health professionals) | Focus groups to explore barriers and facilitators of optimum palliative care management in advanced COPD. | CASP Qualitative<br><br>18/20 |
| Perceived tasks and barriers to GP palliative Care<br><br>Groot (58), 2005, Netherlands                                     | Qualitative<br><br>Aim: To investigate GPs' task perception and barriers involved in palliative care                                                                                  | Setting regional Netherlands<br><br>Participants – 22 GPs with interest in palliative care in three focus groups meeting                                                                                                 | Focus groups                                                                                              | CASP Qualitative<br><br>17/18 |
| Facilitators and barriers to primary care involvement in palliative care<br><br>Hong(64), 2010, Hong Kong                   | Qualitative<br><br>Aim: to investigate the willingness and barriers for primary care physicians in providing palliative care                                                          | Setting: Family Medicine Department in a regional cluster in Kowloon Central / Kowloon East, Hong Kong                                                                                                                   | Focus groups and individual interviews                                                                    | CASP Qualitative<br><br>15/18 |
| GP experience of psychosocial care of dying patients<br><br>Kelly(40), 2008, Australia                                      | Qualitative - to examine experiences and perceptions of GPs providing PC                                                                                                              | Set in GP clinics, 15 GP's who had referred patients recently to a Pall Care service were interviewed, convenience sampling.                                                                                             | Qual interview                                                                                            | CASP Qualitative<br><br>19/20 |



|                                                   |                                                                                                                                                                    |                                                                                                                                                           |                            |                               |
|---------------------------------------------------|--------------------------------------------------------------------------------------------------------------------------------------------------------------------|-----------------------------------------------------------------------------------------------------------------------------------------------------------|----------------------------|-------------------------------|
| Symptoms and problems in the final week of life   | Qualitative                                                                                                                                                        | Setting: Belgium                                                                                                                                          | Semi-structured interview  | CASP Qualitative              |
| Leemans(32) (2012), Belgium                       | Aim: Explore patients' functional, cognitive, physical and psychological burden in last 3 months of life                                                           | Examined the deaths of 228 patients - asking 205 GP's (90% response rate) to participate in semi-structured interview via telephone. Setting of GP clinic |                            | Not available (abstract only) |
| Belgian GP's perspective on terminal sedation     | Qualitative                                                                                                                                                        | Setting: Home care                                                                                                                                        | Semi-structured interviews | CASP Qualitative              |
| Sercu(60), 2014, Belgium                          | Aim: This study explored palliative sedation practice in end-of-life (EoL) home care                                                                               | Participants: 52 GPs who practice end of life care in the home care setting                                                                               |                            | 15/18                         |
| Continuous deep sedation in home end of life care | Study design: Qualitative                                                                                                                                          | Setting: General practice, nursing homes, hospitals                                                                                                       | Semi-structured interviews | CASP Qualitative              |
| Swart(59), 2014, Netherlands                      | Aim: This study examined the considerations concerning the indications for continuous palliative sedation (CPS) and the issues that influence these considerations | Participants: physicians (54) and nurses (36) working in general practice, nursing homes, and hospitals                                                   |                            | 16/18                         |

|                                                                                                                                                   |                                                                                                                                                                                            |                                                                                                                                                                                             |                                               |                                      |
|---------------------------------------------------------------------------------------------------------------------------------------------------|--------------------------------------------------------------------------------------------------------------------------------------------------------------------------------------------|---------------------------------------------------------------------------------------------------------------------------------------------------------------------------------------------|-----------------------------------------------|--------------------------------------|
| <p>Attitudes and experiences of GPs and respiratory therapists in opioid use by GPs and respiratory therapists for dyspnoea in advanced COPD.</p> | <p>Qualitative</p> <p>Aim: To explore experiences in treating advanced OPD and their attitudes regarding the use of opioids for dyspnoea in this context</p>                               | <p>Setting: southern New Brunswick primary care</p> <p>Participants: Convenience sample of 10 GPs and 8 respiratory therapists experienced in providing care for advanced COPD patients</p> | <p>Individual semi-structured interviews.</p> | <p>CASP qualitative</p> <p>19/20</p> |
| <p>Young(46), 2012, Canada</p>                                                                                                                    |                                                                                                                                                                                            |                                                                                                                                                                                             |                                               |                                      |
| <p>GP management of depression at end of life</p>                                                                                                 | <p>Qualitative</p> <p>Aim: This study explored variation in family physicians' opinions regarding the recognition, diagnosis, and management of depression in palliative care patients</p> | <p>Setting: General Practice</p> <p>Participants: 22 GPs</p>                                                                                                                                | <p>Focus groups</p>                           | <p>CASP Qualitative</p> <p>16/18</p> |
| <p>Warmenhoven(55), 2012, Netherlands</p>                                                                                                         |                                                                                                                                                                                            |                                                                                                                                                                                             |                                               |                                      |
